# Supplementary material
Source: publisher figshare collection journal article supplement (https://springernature.figshare.com/ndownloader/files/9057679)
Supplement: Supplementary file [file 9057679]

**Table 1.** Occurrence of charge clusters in the human proteome. The charge clusters were detected by the FCCP program (Belmabrouk et al., 2015).

|                                         | Positive charge clusters | Negative charge clusters |
|-----------------------------------------|--------------------------|--------------------------|
| <b>Total count of charge clusters</b>   | 526                      | 1628                     |
| <b>Protein count*</b>                   | 498                      | 1435                     |
| <b>Protein average size<sup>¥</sup></b> | 781.3 ± 732.6            | 883.4 ± 1095.67          |
| <b>Cluster average size</b>             | 24.23 ± 3.9              | 27.8 ± 7.6               |
| <b>Average count of CC per protein</b>  | 1                        | 1                        |

\*Sequences having NCCs and PCCs

<sup>¥</sup>average size : mean ± standard deviation

NCC: Negative Charge Cluster

PCC: Positive Charge Cluster
